# Supplementary material for: Nanotechnology in the real world: Redeveloping the nanomaterial consumer products inventory
Source: Beilstein J Nanotechnol. 2015 Aug 21;6:1769–80. doi: 10.3762/bjnano.6.181 (PMC4578396; doi:10.3762/bjnano.6.181)
Supplement: File 1 — A compilation of company and product numbers listed by country of origin. A list of all nanomaterial components included in the inventory. Nanotechnology expert survey questions. Additional nanotechnology expert survey results. [file Beilstein_J_Nanotechnol-06-1769-s001.pdf]

# **Supporting Information for Nanotechnology in the real world: Redeveloping the nanomaterial consumer products inventory**

Marina E. Vance<sup>\*1</sup>, Todd Kuiken<sup>2</sup>, Eric P. Vejerano<sup>3</sup>, Sean P. McGinnis<sup>4</sup>, Michael F. Hochella, Jr.<sup>5</sup>, David Rejeski<sup>2</sup> and Matthew S. Hull<sup>1</sup>

Address: <sup>1</sup>Institute for Critical Technology and Applied Science, Virginia Tech, 410 Kelly Hall (0194), 235 Stanger St., Blacksburg, VA 24061, United States, <sup>2</sup>Woodrow Wilson International Center for Scholars, One Woodrow Wilson Plaza - 1300 Pennsylvania Ave., NW, Washington, DC 20004, United States, <sup>3</sup>Department of Civil & Environmental Engineering, Virginia Tech, 418 Durham Hall (0246), Blacksburg, VA 24061, United States, <sup>4</sup>Department of Materials Science and Engineering, Virginia Tech, Holden Hall (0237), Blacksburg, VA 24061, United States and <sup>5</sup>Department of Geosciences, Virginia Tech, 4044 Derring Hall (0420), Blacksburg, VA 24061, United States

Email: Marina E. Vance - [marinaeq@vt.edu](mailto:marinaeq@vt.edu)

\* Corresponding author

## **Contents:**

1. Number of products per country of origin
2. Nanomaterial compositions listed in the inventory
3. Nanotechnology expert survey questions
4. Additional nanotechnology expert survey results

## 1. Number of products per country of origin

**Table S1:** Number of companies and products per country of origin.

|    | Country     | Companies | Products |    | Country        | Companies  | Products    |
|----|-------------|-----------|----------|----|----------------|------------|-------------|
| 1  | USA         | 290       | 773      | 18 | Finland        | 3          | 3           |
| 2  | Korea       | 64        | 132      | 19 | Malaysia       | 3          | 4           |
| 3  | Germany     | 63        | 328      | 20 | Singapore      | 3          | 24          |
| 4  | UK          | 35        | 104      | 21 | Czech Republic | 2          | 16          |
| 5  | Japan       | 32        | 56       | 22 | Netherlands    | 2          | 5           |
| 6  | China       | 24        | 57       | 23 | New Zealand    | 2          | 5           |
| 7  | Denmark     | 12        | 47       | 24 | Sweden         | 2          | 2           |
| 8  | Australia   | 10        | 21       | 25 | Argentina      | 1          | 1           |
| 9  | France      | 10        | 34       | 26 | Brazil         | 1          | 1           |
| 10 | Taiwan      | 10        | 28       | 27 | Iceland        | 1          | 1           |
| 11 | Canada      | 9         | 17       | 28 | India          | 1          | 2           |
| 12 | Italy       | 7         | 14       | 29 | Ireland        | 1          | 1           |
| 13 | Switzerland | 7         | 44       | 30 | Lithuania      | 1          | 1           |
| 14 | Israel      | 6         | 10       | 31 | Mexico         | 1          | 1           |
| 15 | Austria     | 4         | 11       | 32 | Philippines    | 1          | 1           |
| 16 | Poland      | 4         | 17       |    | Unknown        | 6          | 49          |
| 17 | Thailand    | 4         | 4        |    | <b>Total</b>   | <b>622</b> | <b>1814</b> |

## 2. Nanomaterial compositions

**Table S1:** Nanomaterial components listed in the inventory.

|                 |               |                    |
|-----------------|---------------|--------------------|
| Aluminum oxide  | Gold          | Nickel             |
| Boron           | Graphene      | Organics           |
| Calcium         | Graphite      | Palladium          |
| Carbon          | Iodine        | Platinum           |
| Carbon nanotube | Iridium       | Polymer            |
| Carnauba wax    | Iron          | Retinol            |
| Ceramics        | Lead          | Silicon            |
| Cerium oxide    | Liposome      | Silver             |
| Chromium        | Lithium       | Titanium           |
| Clay            | Magnesium     | Tungsten disulfide |
| Cobalt          | Manganese     | Zeolite            |
| Copper          | Nano micelles | Zinc oxide         |
| Fullerene       | Nanocellulose | Zirconia           |

### 3. Nanotechnology expert survey questions

#### Part I

---

Tell us about your expectations for the CPI 2.0.

1. How many products do you expect CPI 2.0 will contain? (*about 1,300 products are currently listed, some of which may no longer exist*)

- ☐ Fewer products (< 1,200)
- ☐ About the same amount of products (~ 1,200 - 1,500)
- ☐ More products (~ 1,500 - 2,000)
- ☐ A lot more products (> 2,000)

2. Have you used the CPI in your work?

- ☐ Yes
- ☐ No

3. How did you use the CPI in your work?

– text answer –

4. Do you think you will use the new CPI in your work?

- ☐ Yes
- ☐ Maybe
- ☐ No

5. To what end do you think you might use the CPI in the future?

– text answer –

#### Part II

---

6. Please suggest new categories of information (describing products or nanomaterials within products) to be added to the CPI.

Current categories present in the inventory are:

- Country or manufacture
- Company name
- Product category (e.g., automotive, food and beverage, goods for children)
- Date added to the inventory

Here are a few examples of new categories to be added:

- Type of nanomaterial used in the product (e.g., silver nanoparticles, carbon nanotubes)
- Location of nanomaterial within the product (e.g., coating, suspended in liquid).

– text answer –

#### Part III

---

Demographic questions.

7. Your Name (*personal identifying information will not be published in any form*)

– text answer –

8. Your organization (*identifying information will not be published*)

– text answer –

9. Your years of experience working with nanotechnology:

- ☐ 0 - 2 years
- ☐ 3 - 5 years
- ☐ 6 - 10 years
- ☐ 11 - 19 years
- ☐ 20+ years

10. How can you describe your organization? (*please check all that apply*)

- ☐ Science Community (university)
- ☐ Science Community (non-university)
- ☐ Nanotechnology Industry
- ☐ Non-nanotechnology Industry
- ☐ Government Agency
- ☐ Non-Governmental Agency
- ☐ Consumer Advocacy Group
- ☐ Other

11. Please enter any additional comments here:

– *text answer* –

#### 4. Selected nanotechnology expert survey results

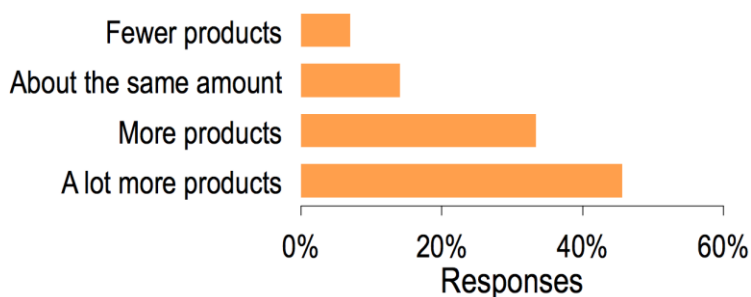

**Figure S1:** Question 1, “How many products do you expect CPI 2.0 will contain?”.

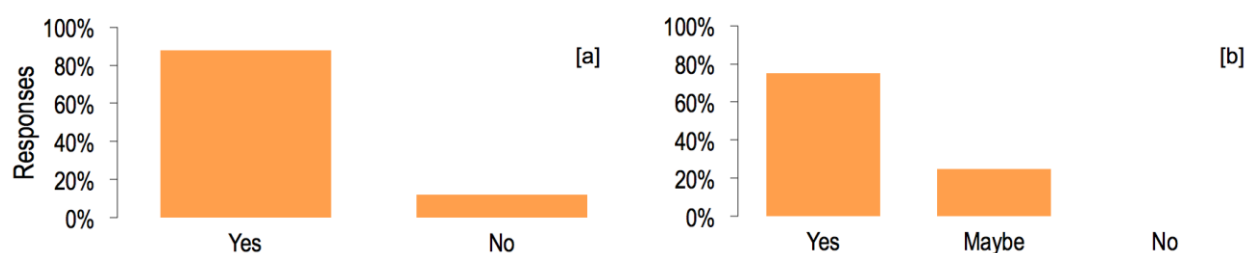

**Figure S2:** (a) Question 2, “Have you used the CPI in your work?” (b) Question 4, “Do you think you will use the new CPI in your work?”.

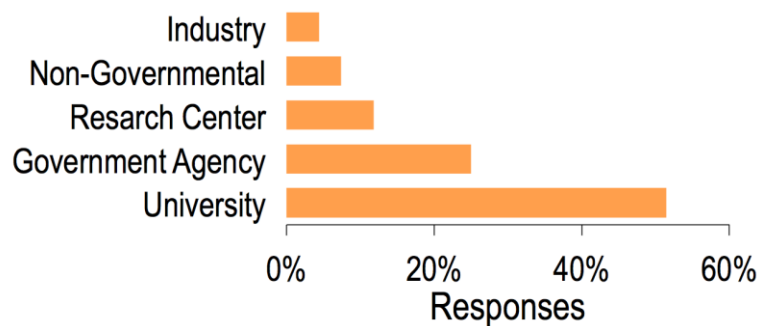

**Figure S3:** Question 10, “How can you describe your organization?”.
